# Supplementary material for: Possible Signaling Pathways Mediating Neuronal Calcium Sensor-1-Dependent Spatial Learning and Memory in Mice
Source: PubMed Central journal article supplement (PMC5266288; doi:10.1371/journal.pone.0170829), 2017-01-25

# S2 Fig

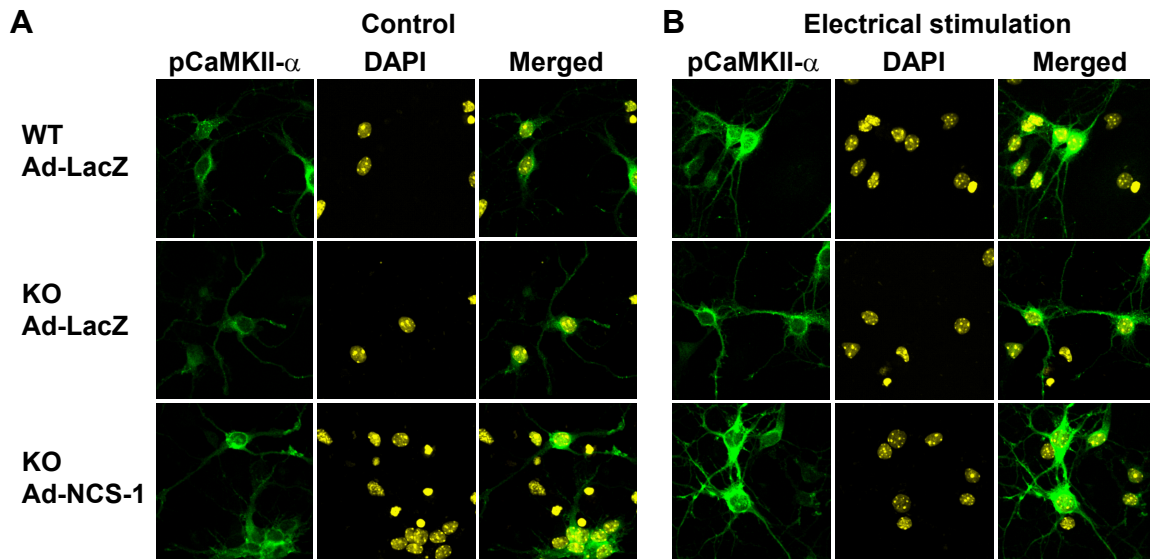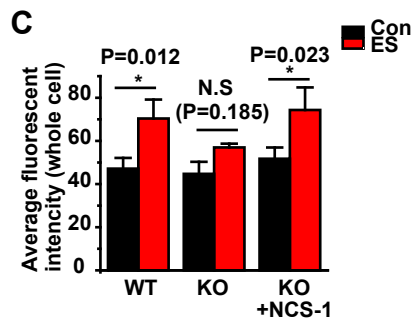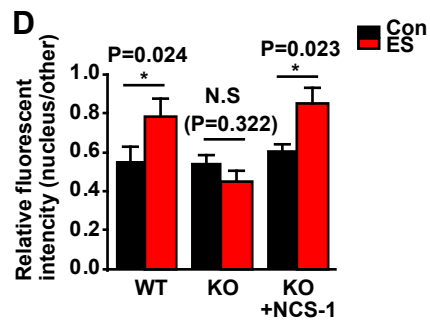

Supplement: pone.0170829.s002.pdf [file pone.0170829.s002.pdf]
